# Supplementary material
Source: PubMed Central journal article supplement (PMC2515935)

**Table S1:** Summary of tumor growth inhibition (T/C values, Day 32)

|                           | <b>T/C value</b> |
|---------------------------|------------------|
| <b>Control</b>            | <b>100%</b>      |
| <b>TXT 7.5mg/kg</b>       | <b>55.4%</b>     |
| <b>G(-) 10mg/kg</b>       | <b>89.1%</b>     |
| <b>TXT + G(-) 10mg/kg</b> | <b>37.3%*</b>    |
| <b>G(-) 20mg/kg</b>       | <b>94.7%</b>     |
| <b>TXT + G(-) 20mg/kg</b> | <b>29.4%*</b>    |

\* T/C value < 42% is considered as significant antitumor activity.

**Figure S1**

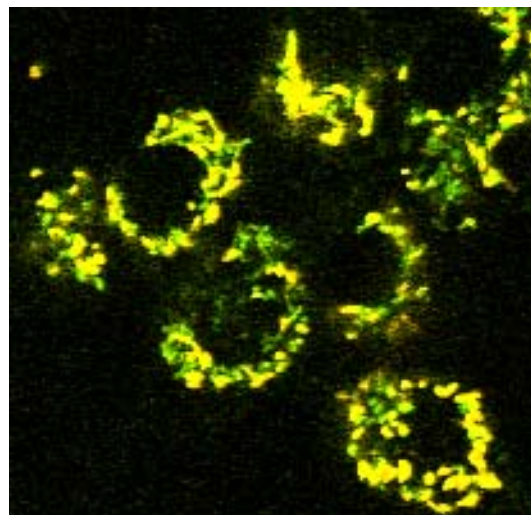

**DMSO Control**

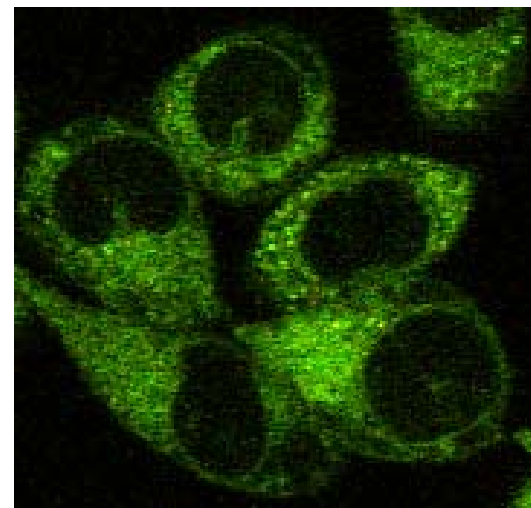

**G(-) 20 $\mu$ M(6h)**

Figure S2

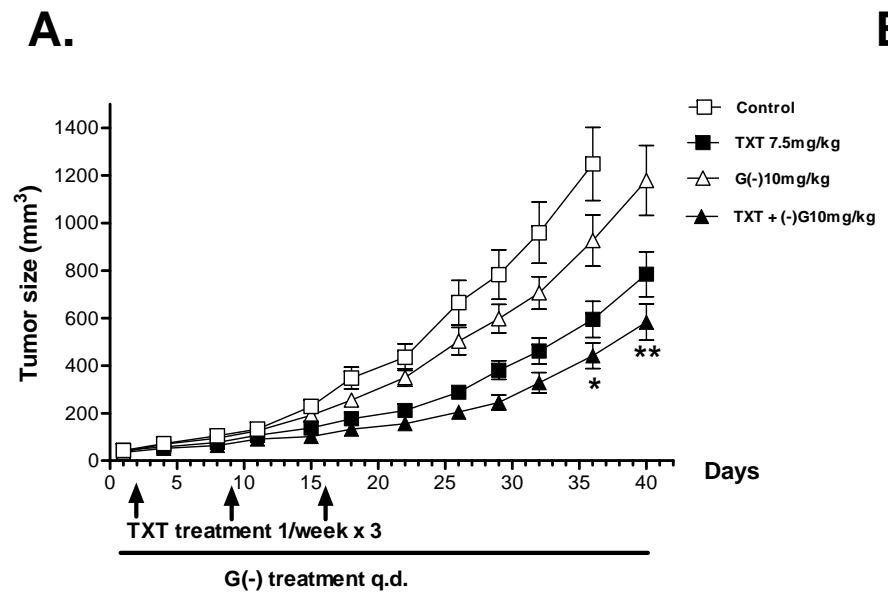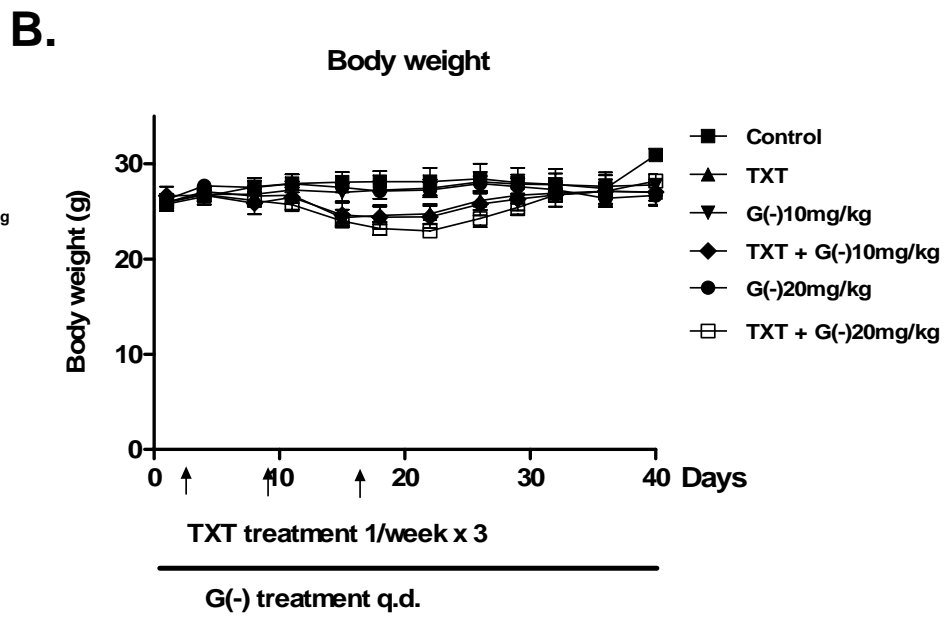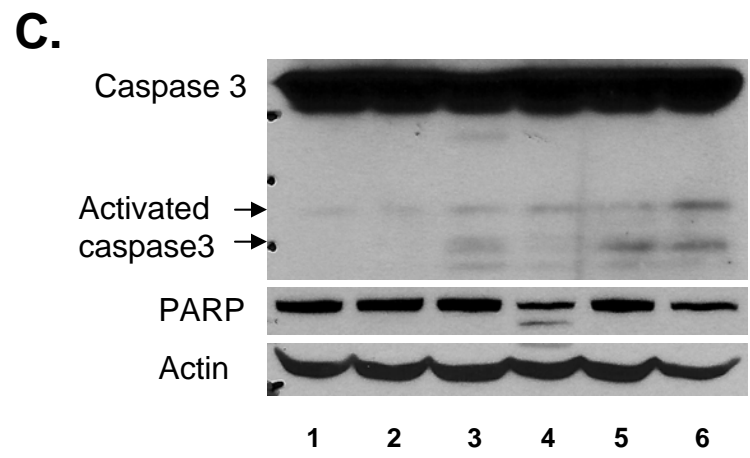

Supplement: NIHMS58672-supplement-supplement_2.pdf [file NIHMS58672-supplement-supplement_2.pdf]
